# Supplementary material for: A Network Model to Describe the Terminal Differentiation of B Cells
Source: PubMed Central journal article supplement (PMC4720151; doi:10.1371/journal.pcbi.1004696), 2016-01-11
Supplement: pcbi.1004696.s002.pdf [file pcbi.1004696.s002.pdf]

## S2 Table

**The B cell network as a continuous dynamical system** The set of ordinary differential equations conforming the continuous version of the B cell regulatory network model.

---


$$\begin{aligned} \frac{dAID}{dt} &= \frac{-e^{25} + e^{-50(\min(\max(STAT6, \min(NF\kappa B, Pax5)), 1 - Blimp1) - 0.5)}}{(1 - e^{25})(1 + e^{-50(\min(\max(STAT6, \min(NF\kappa B, Pax5)), 1 - Blimp1) - 0.5)})} - AID \\ \frac{dAg}{dt} &= -Ag \\ \frac{dBach2}{dt} &= \frac{-e^{25} + e^{-50(\min(Pax5, 1 - Blimp1) - 0.5)}}{(1 - e^{25})(1 + e^{-50(\min(Pax5, 1 - Blimp1) - 0.5)})} - Bach2 \\ \frac{dBcl6}{dt} &= \frac{-e^{25} + e^{-50(\min(\max(STAT5, STAT6, \min(Pax5, Bcl6)), 1 - (\max(Blimp1, Irf4, ERK))) - 0.5)}}{(1 - e^{25})(1 + e^{-50(\min(\max(STAT5, STAT6, \min(Pax5, Bcl6)), 1 - (\max(Blimp1, Irf4, ERK))) - 0.5)})} - Bcl6 \\ \frac{dBCR}{dt} &= \frac{-e^{25} + e^{-50(Ag - 0.5)}}{(1 - e^{25})(1 + e^{-50(Ag - 0.5)})} - BCR \\ \frac{dBlimp1}{dt} &= \frac{-e^{25} + e^{-50(\max(\max(ERK, STAT3), \min(Irf4, 1 - (\max(Pax5, Bcl6, Bach2)))) - 0.5)}}{(1 - e^{25})(1 + e^{-50(\max(\max(ERK, STAT3), \min(Irf4, 1 - (\max(Pax5, Bcl6, Bach2)))) - 0.5)})} - Blimp1 \\ \frac{dCD40}{dt} &= \frac{-e^{25} + e^{-50(CD40L - 0.5)}}{(1 - e^{25})(1 + e^{-50(CD40L - 0.5)})} - CD40 \\ \frac{dCD40L}{dt} &= -CD40L \\ \frac{dERK}{dt} &= \frac{-e^{25} + e^{-50(BCR - 0.5)}}{(1 - e^{25})(1 + e^{-50(BCR - 0.5)})} - ERK \\ \frac{dIL2}{dt} &= -IL2 \\ \frac{dIL2R}{dt} &= \frac{-e^{25} + e^{-50(IL2 - 0.5)}}{(1 - e^{25})(1 + e^{-50(IL2 - 0.5)})} - IL2R \\ \frac{dIL4}{dt} &= -IL4 \\ \frac{dIL4R}{dt} &= \frac{-e^{25} + e^{-50(IL4 - 0.5)}}{(1 - e^{25})(1 + e^{-50(IL4 - 0.5)})} - IL4R \\ \frac{dIL21}{dt} &= -IL21 \\ \frac{dIL21R}{dt} &= \frac{-e^{25} + e^{-50(IL21 - 0.5)}}{(1 - e^{25})(1 + e^{-50(IL21 - 0.5)})} - IL21R \\ \frac{dIrf4}{dt} &= \frac{-e^{25} + e^{-50(\max(\max(NF\kappa B, Irf4), \min(Blimp1, 1 - Bcl6)) - 0.5)}}{(1 - e^{25})(1 + e^{-50(\max(\max(NF\kappa B, Irf4), \min(Blimp1, 1 - Bcl6)) - 0.5)})} - Irf4 \\ \frac{dNF\kappa B}{dt} &= \frac{-e^{25} + e^{-50(CD40 - 0.5)}}{(1 - e^{25})(1 + e^{-50(CD40 - 0.5)})} - NF\kappa B \\ \frac{dPax5}{dt} &= \frac{-e^{25} + e^{-50(\min(\max(Pax5, 1 - Irf4, Bcl6), 1 - (\max(Blimp1, ERK))) - 0.5)}}{(1 - e^{25})(1 + e^{-50(\min(\max(Pax5, 1 - Irf4, Bcl6), 1 - (\max(Blimp1, ERK))) - 0.5)})} - Pax5 \\ \frac{dSTAT3}{dt} &= \frac{-e^{25} + e^{-50(IL21R - 0.5)}}{(1 - e^{25})(1 + e^{-50(IL21R - 0.5)})} - STAT3 \\ \frac{dSTAT5}{dt} &= \frac{-e^{25} + e^{-50(IL2R - 0.5)}}{(1 - e^{25})(1 + e^{-50(IL2R - 0.5)})} - STAT5 \\ \frac{dSTAT6}{dt} &= \frac{-e^{25} + e^{-50(IL4R - 0.5)}}{(1 - e^{25})(1 + e^{-50(IL4R - 0.5)})} - STAT6 \\ \frac{dXBP1}{dt} &= \frac{-e^{25} + e^{-50(\min(Blimp1, 1 - Pax5) - 0.5)}}{(1 - e^{25})(1 + e^{-50(\min(Blimp1, 1 - Pax5) - 0.5)})} - XBP1 \end{aligned}$$


---
